# Supplementary material for: Co-Expression of Cancer Stem Cell Markers Corresponds to a Pro-Tumorigenic Expression Profile in Pancreatic Adenocarcinoma
Source: PubMed Central journal article supplement (PMC4945008; doi:10.1371/journal.pone.0159255), 2016-07-14
Supplement: pone.0159255.s001.pdf [file pone.0159255.s001.pdf]

**S1 Table. Primary, conjugated primary and secondary antibodies used in this study.**

| <b>Primary antibodies</b>            |                 |                      |                          |          |         |         |
|--------------------------------------|-----------------|----------------------|--------------------------|----------|---------|---------|
| Antigen                              | Host / Type     | Clone                | Manufacturer             | Dilution |         |         |
|                                      |                 |                      |                          | IHC      | IF      | FC      |
| CD24                                 | Goat / Poly     |                      | Santa Cruz Biotechnology | 1 : 50   | 1 : 50  | -       |
| CD44                                 | Rabbit / Mono   | EPR1013Y             | Abcam                    | 1 : 50   | 1 : 100 | -       |
| EpCAM                                | Mouse / Mono    | B302 (323-A3)        | Abcam                    | 1 : 50   | 1 : 50  | -       |
| CD133                                | Mouse / Mono    | 17A6.1               | Millipore                | 1 : 100  | 1 : 100 | 1 : 100 |
| Nestin                               | Mouse / Mono    | 10C2                 | Millipore                | 1 : 200  | 1 : 200 | -       |
| $\alpha$ -tubulin                    | Mouse / Mono    | TU-01                | Exbio                    | -        | 1 : 100 | -       |
| <b>Conjugated primary antibodies</b> |                 |                      |                          |          |         |         |
| Antigen                              | Host            | Conjugate            | Manufacturer             | Dilution |         |         |
|                                      |                 |                      |                          | IHC      | IF      | FC      |
| CD24                                 | Mouse           | PE/Cy7               | Biolegend                | -        | -       | 1 : 20  |
| CD44                                 | Mouse           | Brilliant Violet 421 | Biolegend                | -        | -       | 1 : 20  |
| EpCAM                                | Mouse           | APC                  | Biolegend                | -        | -       | 1 : 20  |
| <b>Secondary antibodies</b>          |                 |                      |                          |          |         |         |
| Host                                 | Specificity     | Conjugate            | Manufacturer             | Dilution |         |         |
|                                      |                 |                      |                          | IHC      | IF      | FC      |
| Donkey                               | anti-Rabbit IgG | Alexa Fluor 488      | Invitrogen               | -        | 1 : 200 | -       |
| Donkey                               | anti-Mouse IgG  | Alexa Fluor 488      | Invitrogen               | -        | 1 : 200 | -       |
| Donkey                               | anti-Goat IgG   | Alexa Fluor 488      | Invitrogen               | -        | 1 : 200 | -       |

Mono, monoclonal; Poly, polyclonal.
