# Supplementary material for: Co-Expression of Cancer Stem Cell Markers Corresponds to a Pro-Tumorigenic Expression Profile in Pancreatic Adenocarcinoma
Source: PubMed Central journal article supplement (PMC4945008; doi:10.1371/journal.pone.0159255), 2016-07-14
Supplement: pone.0159255.s002.pdf [file pone.0159255.s002.pdf]

**S2 Table. Primer sequences used for qRT-PCR.**

| <b>Gene symbol</b> | <b>Gene full name</b>                                        | <b>Forward primer (5'→3')</b> | <b>Reverse primer (5'→3')</b> |
|--------------------|--------------------------------------------------------------|-------------------------------|-------------------------------|
| <i>CCND2</i>       | Cyclin D2                                                    | GACTGAGCTGCTGGCTAAGAT         | CTTGGATCCGTCACGTTGGT          |
| <i>CD24</i>        | CD24 molecule                                                | GCTCCTACCCACGCAGATTTA         | GACCACGAAGAGACTGGCTG          |
| <i>CD44</i>        | CD44 molecule (Indian blood group)                           | CCTGGCAGCCCCGATTATTT          | AAGGACACACCCAAGCAAGG          |
| <i>CDH13</i>       | Cadherin 13                                                  | GCAGGCAATTCACCACCAA           | AAATGCAGGTTGGTGCCCAT          |
| <i>CXCL14</i>      | C-X-C motif chemokine ligand 14                              | AGCACTTTTTACCAACGGTCAG        | TGGAGCACAAGAGAGATGGG          |
| <i>EPCAM</i>       | Epithelial cell adhesion molecule                            | TGCTGGAATTGTTGTGCTGG          | AAGATGTCTTCGTCACACGC          |
| <i>FZD6</i>        | Frizzled class receptor 6                                    | GTATGAAAATGGCCTACAACATGAC     | TCCAGATTTGCGAGAGGAAGAA        |
| <i>GAS1</i>        | Growth arrest specific 1                                     | CTCGTCTGCCGTCCAGAAAG          | GCACCTCCCTTCGAGTCC            |
| <i>KIT</i>         | KIT proto-oncogene receptor tyrosine kinase                  | ACAATGGCACGGTTGAATGT          | CAGGGTGTGGGGATGGATTT          |
| <i>KLF4</i>        | Kruppel like factor 4                                        | ATCTTTCTCCACGTTTCGCGTCTG      | AAGCACTGGGGGAAGTCGCTTC        |
| <i>LYN</i>         | LYN proto-oncogene, Src family tyrosine kinase               | CCAGGGAGGAGCCCATTAC           | AAGCAGCACTTTGCCACCTT          |
| <i>PROM1</i>       | Prominin 1 (CD133)                                           | CCATTGACTTCTTGGTGCTGT         | TGGAGTTACGCAGGTTTCTCT         |
| <i>NES</i>         | Nestin                                                       | AGTGATGCCCTTCACCTTG           | GCTCGCTCTACTTTCCCC            |
| <i>SLIT2</i>       | Slit guidance ligand 2                                       | TGACCAACGGACCAATGACC          | CATGGCCCTCCAAGCACTTA          |
| <i>WNT2</i>        | Wnt family member 2                                          | TGGCTCCCTCTGCTCTTGAC          | CTGGCACATTATCGCACATCAC        |
| <i>HSP90AB1</i>    | Heat shock protein 90kDa alpha (cytosolic), class B member 1 | CGCATGAAGGAGACACAGAA          | TCCCATCAAATTCCTTGAGC          |
