# Supplementary material for: Co-Expression of Cancer Stem Cell Markers Corresponds to a Pro-Tumorigenic Expression Profile in Pancreatic Adenocarcinoma
Source: PubMed Central journal article supplement (PMC4945008; doi:10.1371/journal.pone.0159255), 2016-07-14
Supplement: pone.0159255.s004.pdf [file pone.0159255.s004.pdf]

**S4 Table. The role of differentially expressed genes in tumorigenesis – review of literature.**

| <b>Gene</b> | <b>Role in cancer</b> | <b>References (PMID)</b>               |
|-------------|-----------------------|----------------------------------------|
| ABCC4       | pro-tumorigenic       | 21989485                               |
| ADAMTS7     | pro-tumorigenic       | 18927302                               |
| ADAMTS8     | mixed                 | 16152618; 25636539                     |
| ADM         | pro-tumorigenic       | 25475159; 12606950                     |
| ADRA2A      | pro-tumorigenic       | 18416462; 18604234; 24559182           |
| ANO1        | pro-tumorigenic       | 24493744; 24639373                     |
| ARHGEF2     | pro-tumorigenic       | 24525234; 22847784                     |
| ASPM        | mixed                 | 24830737; 23896173; 21923303           |
| BAMBI       | pro-tumorigenic       | 19328798; 20189233; 24912656; 23807684 |
| BGN         | pro-tumorigenic       | 23007878; 21879307; 24228112           |
| BUB1B       | mixed                 | 23242215; 23154965                     |
| CCND2       | anti-tumorigenic      | 12684418; 22303414; 17270028           |
| CD24        | pro-tumorigenic       | 17283135; 22335271                     |
| CD74        | mixed                 | 24594996; 24463084; 19499276; 22611320 |
| CD9         | mixed                 | 22095071; 25955689; 15047125; 20940407 |
| CDC6        | mixed                 | 18048387; 12006585; 16572177; 22201124 |
| CDH13       | anti-tumorigenic      | 20607704; 15245595                     |
| CDKN3       | mixed                 | 23775190; 25735390; 24573179; 22390936 |
| CENPF       | pro-tumorigenic       | 17205517; 23791740; 23163484; 20828406 |
| CLDN11      | anti-tumorigenic      | 21468549; 19956721; 24999589           |
| CLU         | mixed                 | 12370533; 22967941; 21609464           |
| CP          | pro-tumorigenic       | 25595436                               |
| CSF1        | pro-tumorigenic       | 24498570; 11257139                     |
| CTH         | mixed                 | 15347670; 25205294; 22360859; 25193114 |
| CTSS        | pro-tumorigenic       | 24875536; 23629809; 25086747           |
| CXCL14      | pro-tumorigenic       | 18054154; 23294544                     |
| CXCR7       | pro-tumorigenic       | 25407240; 25341042                     |
| CYP1A1      | pro-tumorigenic       | 23576571; 19531241                     |
| DLGAP5      | pro-tumorigenic       | 24324629; 22022601; 24349376           |
| DSC2        | anti-tumorigenic      | 23836524; 25119898                     |
| DSC3        | anti-tumorigenic      | 22941060; 24664224; 21364582           |
| DSG2        | mixed                 | 24166502; 4896103; 19091121            |
| EDN1        | pro-tumorigenic       | 18758494                               |
| ELMO1       | pro-tumorigenic       | 25360637; 23591873; 24819662; 22415709 |
| EMILIN2     | anti-tumorigenic      | 24374807; 20360940                     |
| ENPEP       | mixed                 | 24885240; 14998491                     |
| ENPP2       | pro-tumorigenic       | 19855166; 12119361                     |
| ENTPD1      | pro-tumorigenic       | 22751118; 21390184                     |
| EPHA6       | pro-tumorigenic       | 26041887                               |
| EPHB2       | anti-tumorigenic      | 20339854; 24096486; 24959213           |
| F11R        | mixed                 | 25416560; 25916097; 24265754; 25033702 |
| F3          | pro-tumorigenic       | 18373885                               |
| FGFR4       | pro-tumorigenic       | 12447688; 25031272; 23344261; 26045670 |
| FOXF1       | anti-tumorigenic      | 24186199                               |
| FYN         | mixed                 | 20151426; 19968749; 12450793           |
| FZD6        | pro-tumorigenic       | 22249030                               |
| FZD7        | pro-tumorigenic       | 24474766                               |
| GAS1        | anti-tumorigenic      | 22846196; 22311470; 21111449           |

| <b>Gene</b> | <b>Role in cancer</b> | <b>References (PMID)</b>               |
|-------------|-----------------------|----------------------------------------|
| GBP2        | anti-tumorigenic      | 23001506; 19003964                     |
| GFRA1       | pro-tumorigenic       | 23351331; 25009298                     |
| GLI3        | pro-tumorigenic       | 23176625; 20814245                     |
| GPR183      | pro-tumorigenic       | 25852561                               |
| GPR56       | pro-tumorigenic       | 17575113                               |
| GPR65       | pro-tumorigenic       | 23707809                               |
| GRIA4       | pro-tumorigenic       | 21207374                               |
| HORMAD1     | pro-tumorigenic       | 18089785; 22776561                     |
| CHL1        | mixed                 | 21408220                               |
| CHRM3       | pro-tumorigenic       | 22222710                               |
| CHST11      | pro-tumorigenic       | 26084610; 21658254                     |
| CHST11      | anti-tumorigenic      | 25586191; 21658254                     |
| IL1A        | pro-tumorigenic       | 17096856                               |
| IL1B        | pro-tumorigenic       | 17096856                               |
| IL6         | pro-tumorigenic       | 24097820                               |
| IL6R        | pro-tumorigenic       | 26130650; 22552503                     |
| ITGA2       | mixed                 | 24500968; 26258411; 25662931           |
| ITGA3       | mixed                 | 23652300; 9508191; 23786209            |
| ITGA8       | mixed                 | 15592496; 20678483,                    |
| ITGB3       | pro-tumorigenic       | 21622897; 21996748                     |
| JAG1        | pro-tumorigenic       | 25309874                               |
| JAM2        | pro-tumorigenic       | 23277282                               |
| KCNMA1      | pro-tumorigenic       | 22899999; 17146446                     |
| KIT         | pro-tumorigenic       | 21320746                               |
| KLF4        | anti-tumorigenic      | 25060774; 25137052; 24060862           |
| KYNU        | anti-tumorigenic      | 24064976                               |
| LAMA3       | pro-tumorigenic       | 23907728; 19945619                     |
| LPAR3       | pro-tumorigenic       | 20331961; 22876164                     |
| LYN         | pro-tumorigenic       | 17088984; 22805580                     |
| MCAM        | pro-tumorigenic       | 21286374; 25685061; 22754372           |
| MET         | pro-tumorigenic       | 21864475                               |
| MITF        | pro-tumorigenic       | 26168401; 25605940                     |
| MSX2        | pro-tumorigenic       | 23162473                               |
| NCAM2       | pro-tumorigenic       | 21214674                               |
| NEFL        | anti-tumorigenic      | 25312269; 22319610; 2399247            |
| NFIB        | pro-tumorigenic       | 21764851; 23161775                     |
| NLK         | pro-tumorigenic       | 26269673; 25371216; 24789020           |
| NOG         | pro-tumorigenic       | 22547073; 21249149                     |
| NOX4        | pro-tumorigenic       | 21118808; 24946933                     |
| NPY         | mixed                 | 21439311                               |
| NRP1        | pro-tumorigenic       | 22025255                               |
| P2RY1       | pro-tumorigenic       | 23090120                               |
| PCDH10      | anti-tumorigenic      | 25590240; 24740680; 25086586; 20353276 |
| PENK        | anti-tumorigenic      | 24289328                               |
| PLA2G4A     | anti-tumorigenic      | 23307260                               |
| PLAUR       | pro-tumorigenic       | 25310970; 23843896                     |
| PLK1        | pro-tumorigenic       | 22892842; 15141022                     |
| PMP22       | pro-tumorigenic       | 21159173; 15995147; 20847343           |
| POSTN       | mixed                 | 25840689                               |
| PPAP2A      | anti-tumorigenic      | 25210149                               |

| <b>Gene</b> | <b>Role in cancer</b> | <b>References (PMID)</b>               |
|-------------|-----------------------|----------------------------------------|
| PREX2       | pro-tumorigenic       | 23753921; 25151370; 24375644           |
| PRRX1       | mixed                 | 23201163; 23807160; 25404478; 25428393 |
| PTGER4      | pro-tumorigenic       | 23090667                               |
| PTHLH       | pro-tumorigenic       | 11893937                               |
| PTX3        | pro-tumorigenic       | 25964543; 23828517; 24457902           |
| RAC2        | mixed                 | 20822528; 24770346; 21893191           |
| RARB        | anti-tumorigenic      | 25232244; 24720764                     |
| RELN        | anti-tumorigenic      | 16472607; 20847288                     |
| RGS6        | anti-tumorigenic      | 25120791; 23598467                     |
| RPS6KA5     | pro-tumorigenic       | 23604116; 21106525                     |
| SCN5A       | pro-tumorigenic       | 20651255; 22678159                     |
| SEMA3C      | pro-tumorigenic       | 22924992; 25464848                     |
| SEMA4D      | pro-tumorigenic       | 21812859; 20858260                     |
| SEMA6A      | pro-tumorigenic       | 25082288; 23007403; 25576923           |
| SERPINB2    | anti-tumorigenic      | 18548086                               |
| SERPINE1    | pro-tumorigenic       | 26180080                               |
| SHC3        | pro-tumorigenic       | 22311806; 15870690                     |
| SLC4A4      | pro-tumorigenic       | 25612232                               |
| SLIT2       | anti-tumorigenic      | 20068157; 23314850                     |
| SMAD9       | pro-tumorigenic       | 22452883                               |
| SMURF2      | mixed                 | 25191523; 22231558                     |
| SORT1       | pro-tumorigenic       | 25871389; 25037567                     |
| SPOCK1      | pro-tumorigenic       | 23022495; 24134845                     |
| SRPX        | anti-tumorigenic      | 15021917; 19424611; 12874760; 12716466 |
| TEK         | pro-tumorigenic       | 18366015                               |
| TFAP2C      | pro-tumorigenic       | 24469049                               |
| TGFBR3      | anti-tumorigenic      | 17999987; 17192875; 23387308           |
| TNFSF10     | anti-tumorigenic      | 24948009                               |
| TOP2A       | mixed                 | 25237769; 25304659; 11943709           |
| TPBG        | pro-tumorigenic       | 25066861                               |
| TRPA1       | pro-tumorigenic       | 24037916; 23219522                     |
| TRPC3       | pro-tumorigenic       | 23580589                               |
| TRPC6       | pro-tumorigenic       | 23497198; 24418082; 23700295; 18452628 |
| TRPV2       | pro-tumorigenic       | 25001513                               |
| TXNIP       | anti-tumorigenic      | 22750447                               |
| UACA        | mixed                 | 14961764; 23204231                     |
| UCP2        | pro-tumorigenic       | 25805929; 24523901; 22705884           |
| UNC5B       | anti-tumorigenic      | 21922135; 24528886                     |
| UNC5C       | mixed                 | 20032384; 23178624; 19331160           |
| VASH2       | pro-tumorigenic       | 25916042                               |
| VCAN        | pro-tumorigenic       | 19160015; 23449934; 24927163           |
| VTN         | pro-tumorigenic       | 19998373; 23327926; 23462327           |
| WFDC1       | pro-tumorigenic       | 18842679; 15305342                     |
| WNT2        | pro-tumorigenic       | 25232495; 25146168; 22763454           |
| WNT2B       | pro-tumorigenic       | 25120849                               |

PMID – reference number for PubMed citations.
